# Supplementary figures and images for: Direct binding of RalA to PKCη and its crucial role in morphological change during keratinocyte differentiation
Source: PubMed Central journal article supplement — Mol Biol Cell. 2011 Apr 15;22(8):1340–52. doi: 10.1091/mbc.E10-09-0754 (PMC3078077; doi:10.1091/mbc.e10-09-0754), 2011-04-15

# Supplementary figure 1.

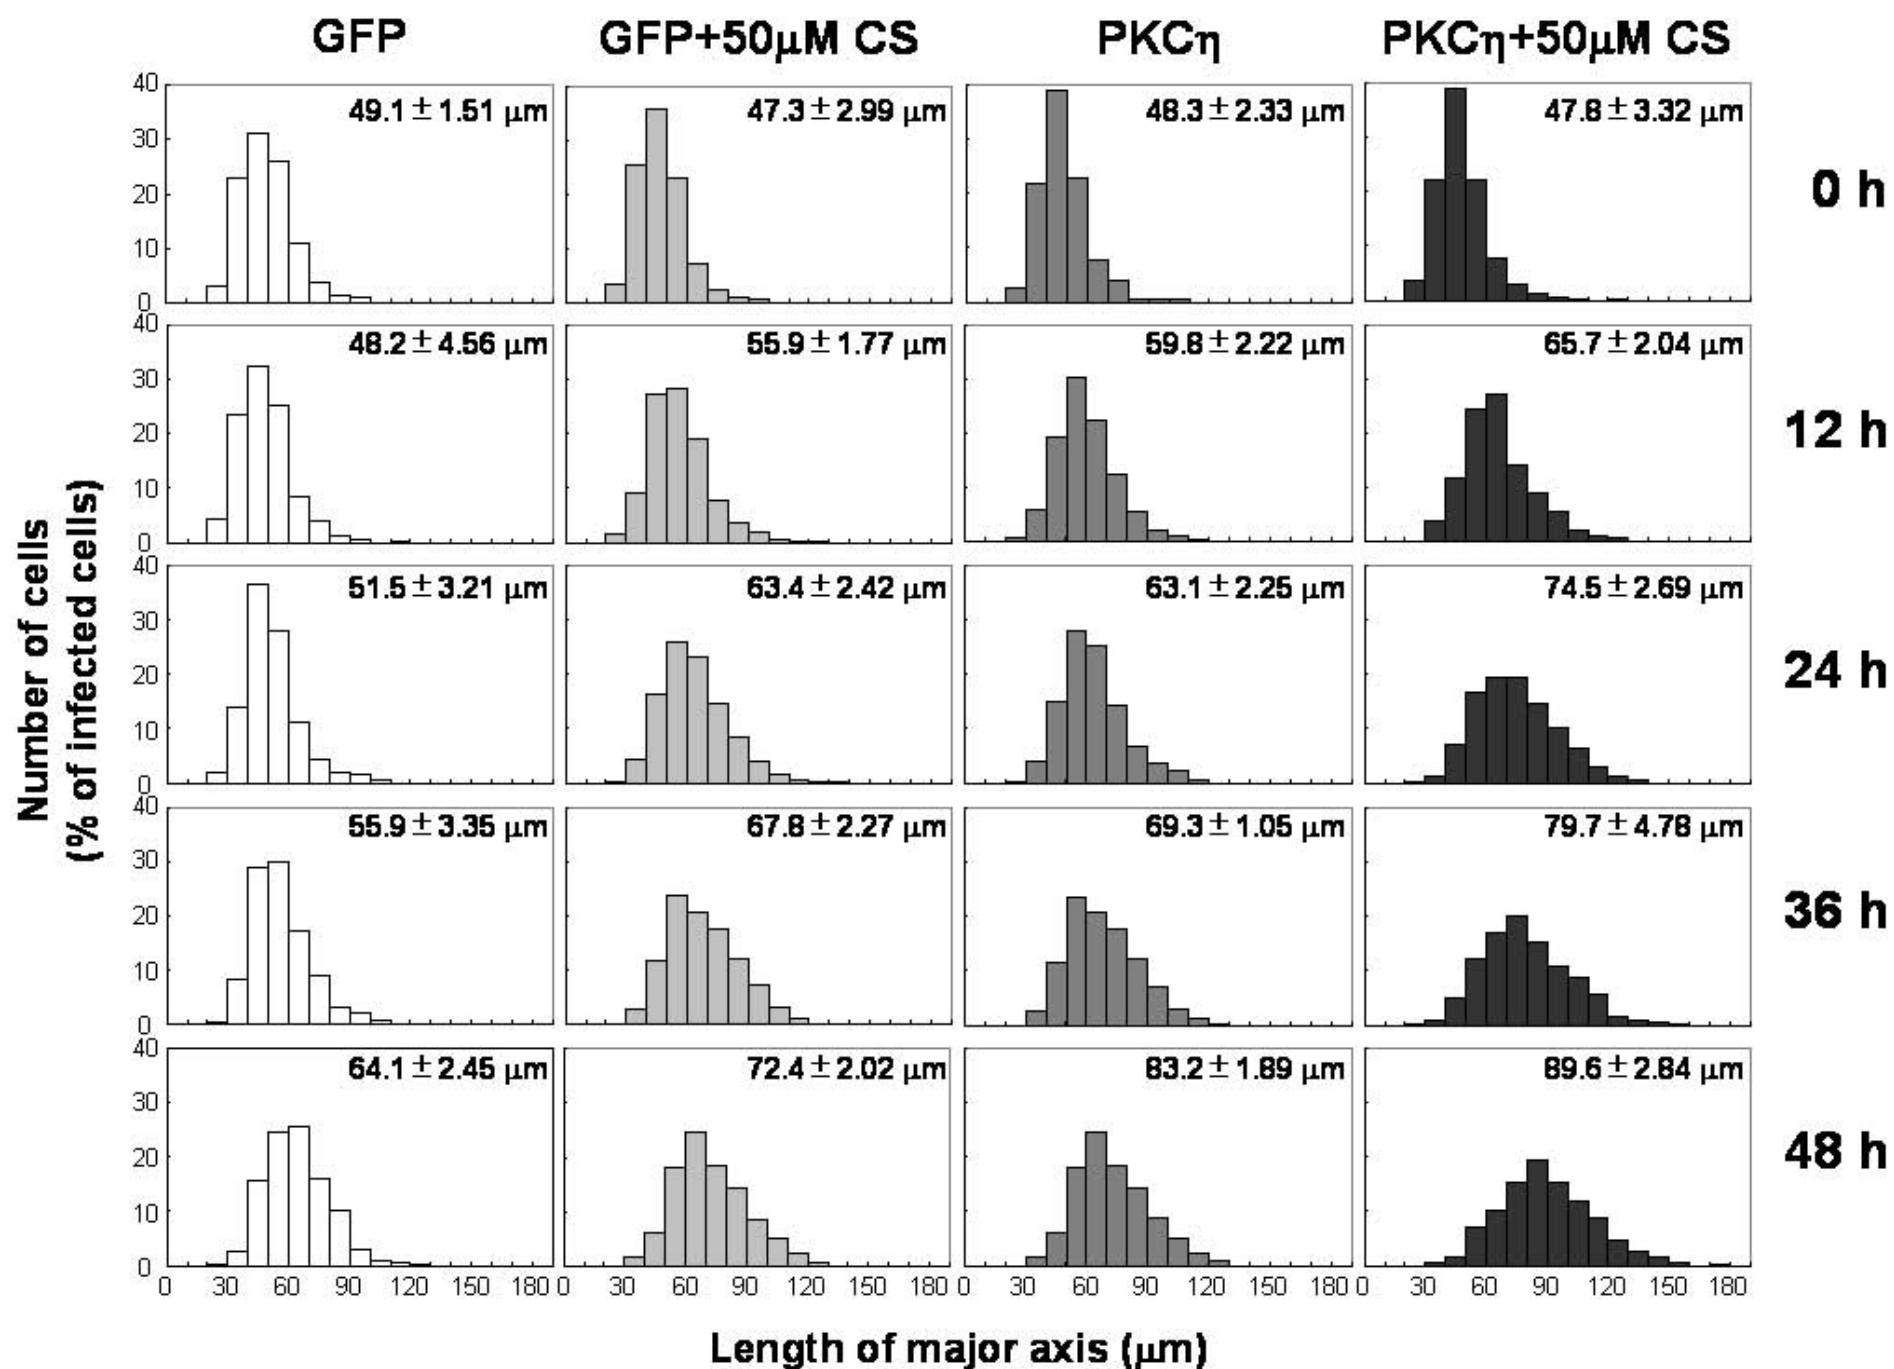

## Supplementary figure 2.

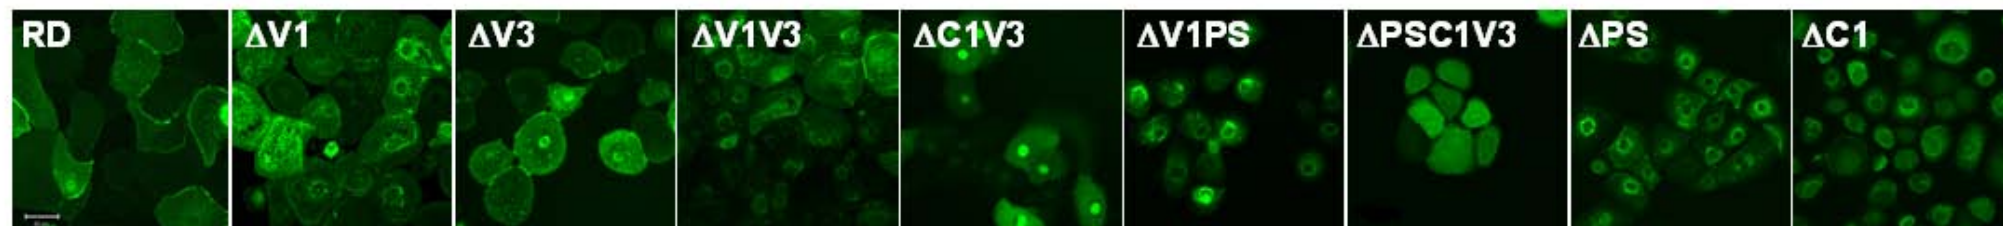

in Keratinocyte

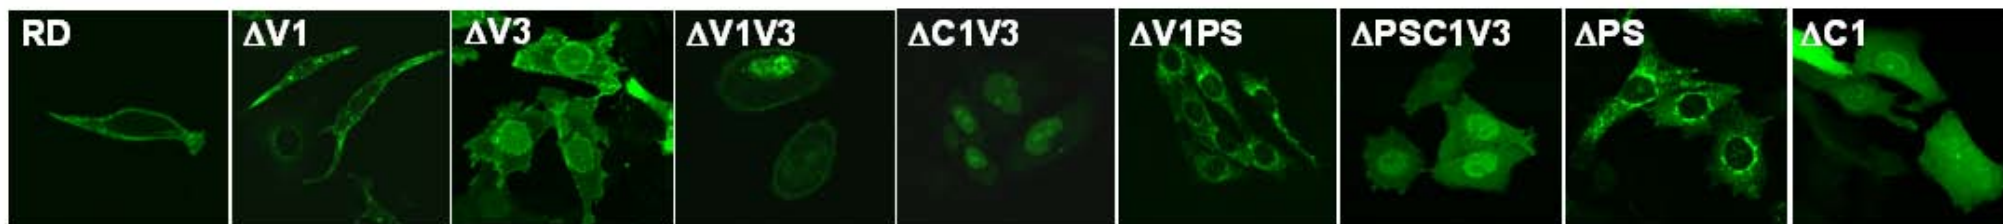

in CHO-K1

# Supplementary figure 3

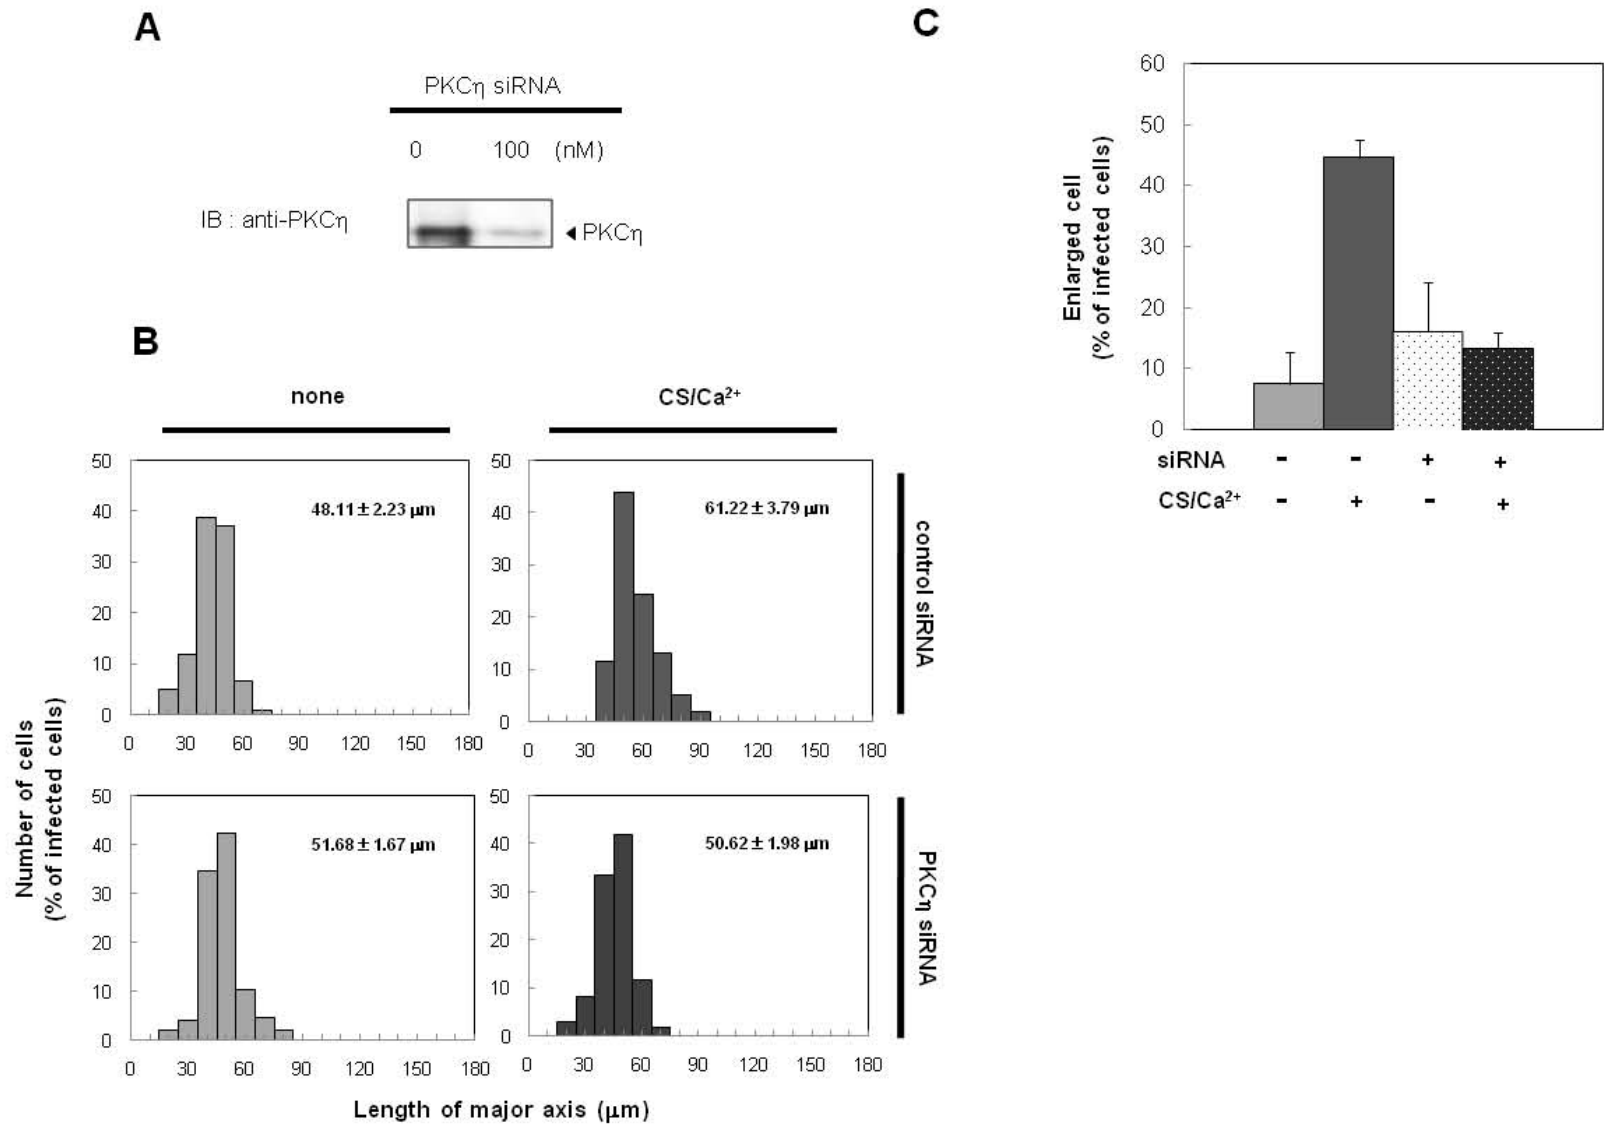

Supplement: E10-09-0754_1.pdf [file E10-09-0754_1.pdf]
